# Supplementary material for: Observational Evidence for Desert Amplification Using Multiple Satellite Datasets
Source: PubMed Central journal article supplement (PMC5435705; doi:10.1038/s41598-017-02064-w), 2017-05-17
Supplement: 41598_2017_2064_MOESM1_ESM.pdf [file 41598_2017_2064_MOESM1_ESM.pdf]

# **Supporting Figure**

## **Observational Evidence for Desert Amplification Using Multiple Satellite Datasets**

Nan Wei<sup>1,2</sup>, Liming Zhou<sup>2\*</sup>, Yongjiu Dai<sup>1</sup>, Geng Xia<sup>2</sup>, Wenjian Hua<sup>2,3</sup>

<sup>1</sup>School of Atmospheric Sciences, Sun Yat-Sen University, Guangzhou, 519082, China

<sup>2</sup>Department of Atmospheric and Environmental Sciences, University at Albany, State  
University of New York, Albany, NY 12222, USA

<sup>3</sup>Key Laboratory of Meteorological Disaster, Ministry of Education (KLME)/Joint  
International Research Laboratory of Climate and Environment Change (ILCEC)/Collaborative  
Innovation Center on Forecast and Evaluation of Meteorological Disasters (CIC-FEMD),  
Nanjing University of Information Science & Technology, Nanjing, 210044, China

### **List of supporting figure**

Supporting Figure S1

1

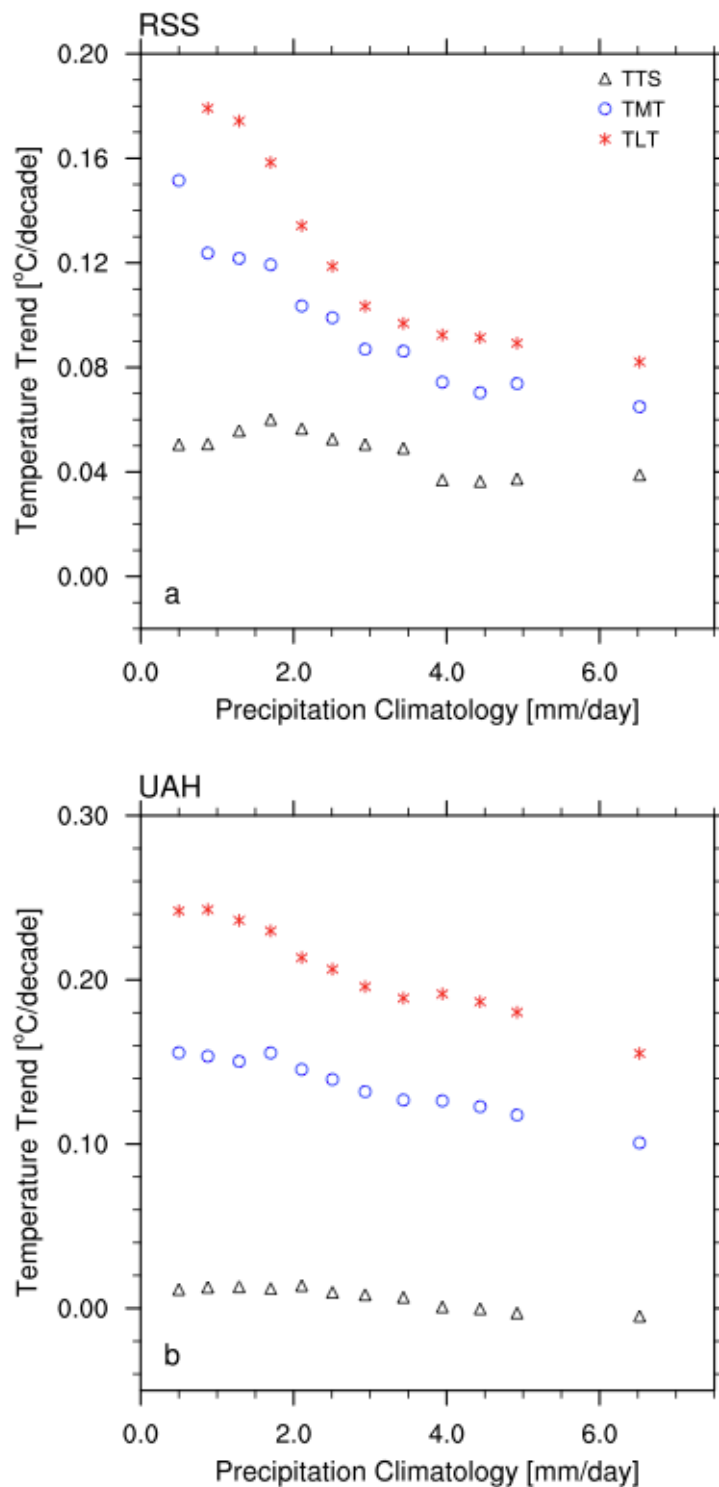

2  
3  
4  
5  
6

**Figure S1.** Zonal mean annual temperature trends (°C/decade) of TLT, TMT and TTS from (a) RSS and (b) UAH for the period 1979–2015 as a function of zonal mean climatological annual precipitation (mm/day) in terms of 12 large-scale climate zones.
